# Supplementary material for: Arbuscular Mycorrhizal Fungi from Argentinean Highland Puna Soils Unveiled by Propagule Multiplication
Source: MDPI journal article supplement (doi:10.3390/plants10091803), 2021-08-30
Supplement: s1 [file s1]

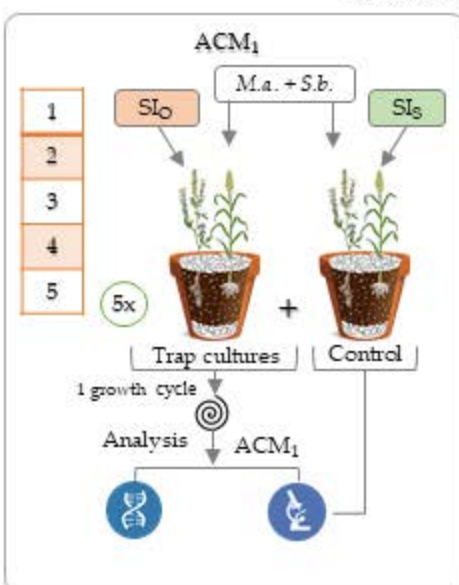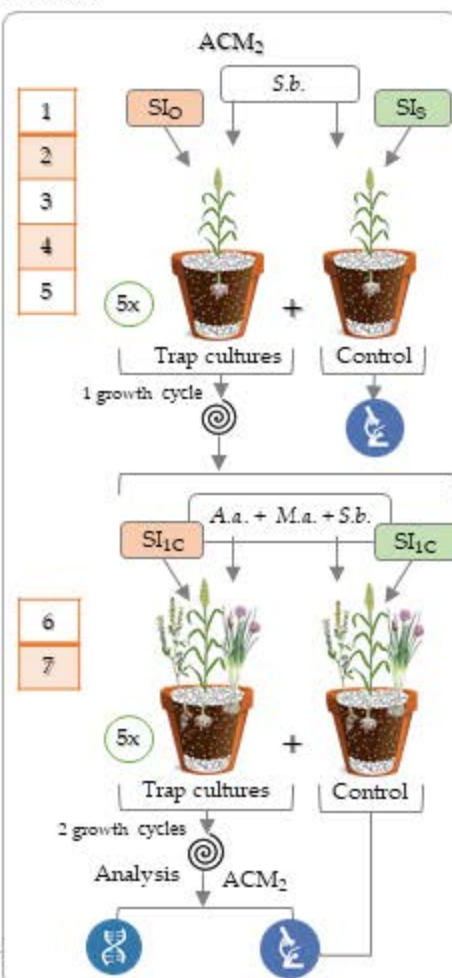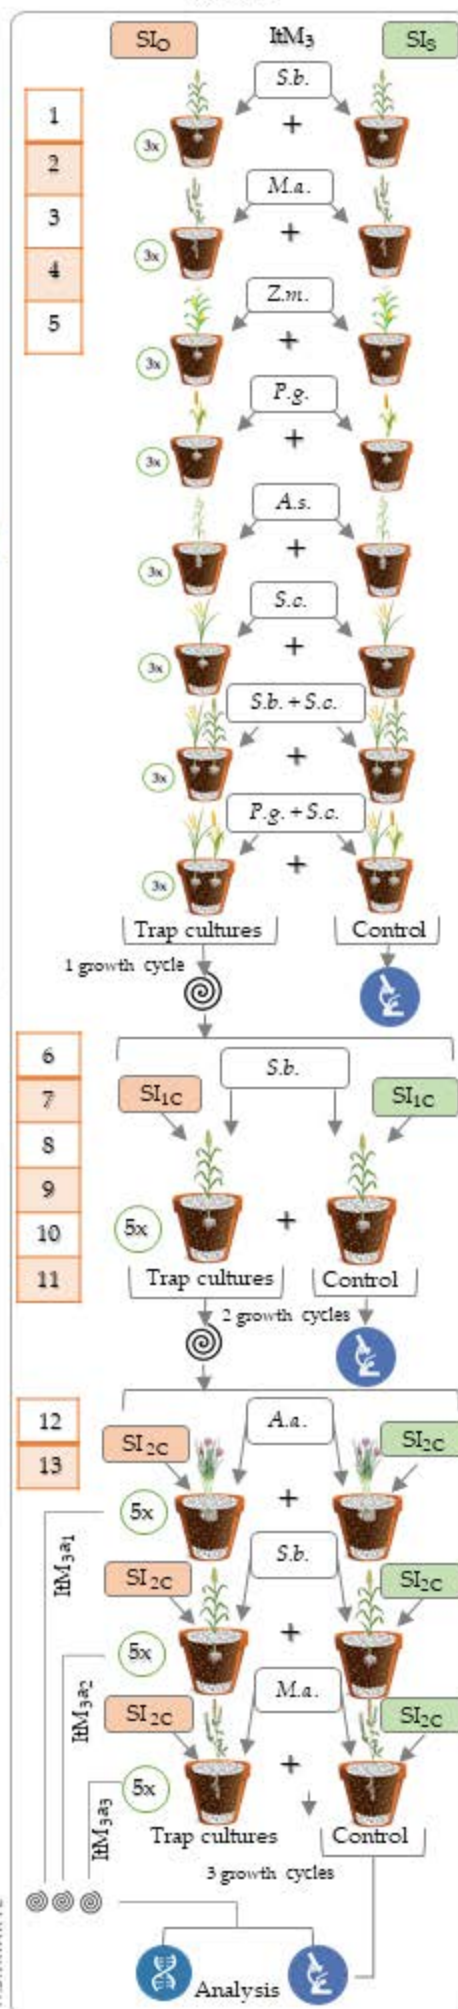

## References

- S.b.- *Sorghum bicolor* (L.) Moench.  
 M.a.- *Melilotus albus* Medik.  
 Z.m.- *Zea mays* L.  
 P.g.- *Pennisetum glaucum* (L.) R. Br.  
 A.s.- *Avena sativa* L.  
 S.c.- *Secale cereale* L.  
 A.a.- *Allium ampeloprasum* var. *porrum* (L.) J. Gay.

ACM<sub>1</sub>, Abra del Cónдор soil, Trap Culture Methodology with 1 growth cycle  
 ACM<sub>2</sub>, Abra del Cónдор soil, Trap Culture Methodology with 2 growth cycles  
 ITM<sub>3</sub>, Iturbe soil, Trap Cultures Methodology with 3 growth cycles

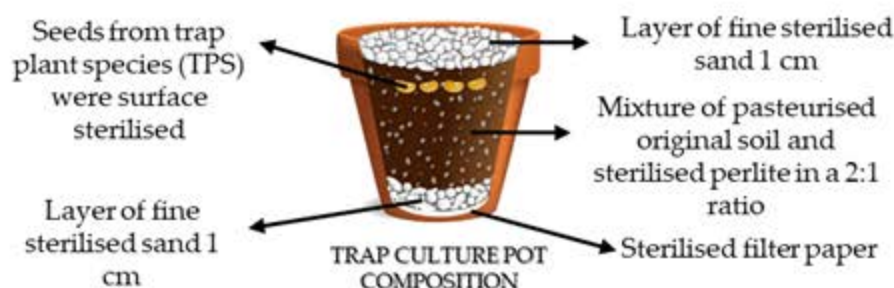

- SI<sub>O</sub> Soil inoculum original  
 SI<sub>S</sub> Soil inoculum sterilised  
 SI<sub>1C</sub> Soil inoculum original 1 growth cycle  
 SI<sub>1C</sub> Soil inoculum sterilised 1 growth cycle  
 SI<sub>2C</sub> Soil inoculum original 2 growth cycles  
 SI<sub>2C</sub> Soil inoculum sterilised 2 growth cycles

- 3x Number of replicas  
 5x Number of replicas  
 Microscopic analysis  
 Genomic analysis  
 Month  
 Homogenised
