# Supplementary material for: Arbuscular Mycorrhizal Fungi from Argentinean Highland Puna Soils Unveiled by Propagule Multiplication
Source: MDPI journal article supplement (doi:10.3390/plants10091803), 2021-08-30
Supplement: s1 [file s1]

**Table S3.** Dominant plant species sampled at two elevational sites of the Puna

| Site               | Plant species                                                                                                                                                                                                                                                                                                                                                                                                                          |
|--------------------|----------------------------------------------------------------------------------------------------------------------------------------------------------------------------------------------------------------------------------------------------------------------------------------------------------------------------------------------------------------------------------------------------------------------------------------|
| Abra del<br>Cónдор | <i>Bouteloua barbata</i> (C <sub>4</sub> ), <i>Bromus catharticus</i> Vahl (C <sub>3</sub> ), <i>Danthonia annableae</i> P.M. Peterson & Rúgolo (C <sub>3</sub> ), <i>Jarava ichu</i> (Ruiz & Pav.) Kunth var. <i>pungens</i> (Nees & Meyen) Ciald. (C <sub>3</sub> ) and <i>Jarava subaristata</i> (Matthei) Matthei (C <sub>3</sub> ).                                                                                               |
| Iturbe             | <i>Aristida asplundii</i> Henrard (C <sub>4</sub> ), <i>Bouteloua barbata</i> Lag. (C <sub>4</sub> ), <i>Cynodon dactylon</i> (L.) Pears. var. <i>biflorus</i> Merino (C <sub>4</sub> ), <i>Eragrostis nigricans</i> (Kunth) Steud. var. <i>punensis</i> Nicora (C <sub>4</sub> ), <i>Jarava plumosula</i> (Nees ex Steud) F. Rojas (C <sub>3</sub> ), and <i>Muhlenbergia alopecuroides</i> (Griseb.) P.M. Peterson (C <sub>4</sub> ) |
