# Supplementary material for: Arbuscular Mycorrhizal Fungi from Argentinean Highland Puna Soils Unveiled by Propagule Multiplication
Source: MDPI journal article supplement (doi:10.3390/plants10091803), 2021-08-30
Supplement: s1 [file s1]

**Table S4.** Results of Blastn procedure and the criteria for selection of homologous *Funneliformis* sequences used in phylogenetic analysis

|                                                      | Sequences obtained in this study |                |              |          |                |              |          |                |              |          |                |              |          |                |              |
|------------------------------------------------------|----------------------------------|----------------|--------------|----------|----------------|--------------|----------|----------------|--------------|----------|----------------|--------------|----------|----------------|--------------|
|                                                      | KT950811                         |                |              | KT950812 |                |              | KT950813 |                |              | KT950814 |                |              | KT950815 |                |              |
| Sequences available at NCBI and/or MAARJAM databases | E-value                          | Query cover* % | Max ident* % | E-value  | Query cover* % | Max ident* % | E-value  | Query cover* % | Max ident* % | E-value  | Query cover* % | Max ident* % | E-value  | Query cover* % | Max ident* % |
| <i>Funneliformis mosseae</i> (JQ048902)              | 5e-152                           | 100            | 99.34        | 7e-132   | 100            | 98.5         | 2e-161   | 99.7           | 99           | 2.4e-154 | 99.7           | 97.7         | 2.8e-161 | 100            | 99           |
| <i>F. mosseae</i> (GU966531)                         | 5e-152                           | 100            | 99.34        | 7e-125   | 100            | 98.5         | -        | -              | -            | -        | -              | -            | 5e-152   | 100            | 99.34        |
| <i>F. mosseae</i> (JF439112)                         | 1e-152                           | 99             | 99.7         | -        | -              | -            | -        | -              | -            | 1e-143   | 99             | 97.7         | 2.8e-161 | 100            | 99           |
| <i>F. mosseae</i> (FR750030)                         | 1e-152                           | 99             | 99.7         | -        | -              | -            | 1.5e-159 | 99.7           | 98.7         | 1.3e-152 | 99.7           | 97.4         | 2.8e-161 | 100            | 99           |
| <i>F. mosseae</i> (FN547490)                         | 1e-152                           | 99             | 99.7         | -        | -              | -            | 1.5e-159 | 99.7           | 98.7         | 1.3e-152 | 99.7           | 97.4         | 1e-152   | 99             | 99.7         |
| <i>F. mosseae</i> (AF145735)                         | 1e-162                           | 99.7           | 99.3         | -        | -              | -            | -        | -              | -            | -        | -              | -            | -        | -              | -            |
| <i>F. caledononium</i> (MH590067)                    | 2e-141                           | 99             | 96.3         | 1e-118   | 100            | 95.7         | 2e-141   | 99             | 96           | 2e-134   | 99             | 94.3         | 4e-144   | 100            | 96           |
| <i>F. geosporum</i> (JQ048887)                       | 2e-141                           | 99             | 96.3         | 1e-117   | 100            | 95.4         | 1e-132   | 99             | 94           | 2e-128   | 99             | 93           | 2e-136   | 100            | 95           |
| <i>F. coronatum</i> (FM876795)                       | 3e-139                           | 99             | 96           | 7e-115   | 100            | 95           | 1e-138   | 99             | 95.7         | 4e-132   | 99             | 94           | 3e-140   | 100            | 96           |

|                                              |        |    |      |       |     |      |        |    |      |        |    |      |        |     |      |
|----------------------------------------------|--------|----|------|-------|-----|------|--------|----|------|--------|----|------|--------|-----|------|
| <i>Septoglomus deserticola</i><br>(AJ746249) | 4e-112 | 99 | 89.7 | 1e-92 | 100 | 88.5 | 5e-111 | 99 | 88.7 | 2e-111 | 99 | 88.7 | 8e-115 | 100 | 89.7 |
| <i>Scutellospora calospora</i> (JF439140)    | 2e-64  | 66 | 93.7 | 4e-61 | 62  | 92   | 9e-64  | 67 | 92.6 | 7e-65  | 53 | 93   | 7e-65  | 67  | 93.2 |
| <i>Ambispora gerdemanni</i><br>(KC166283)    | 1e-62  | 50 | 93.5 | 1e-58 | 60  | 91.1 | 2e-60  | 51 | 91.7 | 4e-62  | 51 | 92.4 | 4e-62  | 52  | 92.4 |
| <i>Acaulospra lacunosa</i><br>(KP756582)     | 4e-61  | 46 | 96.4 | 2e-58 | 54  | 94.4 | 2e-60  | 47 | 95   | 4e-62  | 47 | 95.8 | 2e-62  | 47  | 95.8 |
| <i>Gigaspora margarita</i><br>(JF817010)     | 1e-62  | 76 | 93.5 | 2e-59 | 61  | 91.8 | 2e-60  | 52 | 91.8 | 3e-63  | 52 | 93.1 | 3e-63  | 77  | 93.1 |

\* Query coverage, Max. identity
