# Supplementary material for: Arbuscular Mycorrhizal Fungi from Argentinean Highland Puna Soils Unveiled by Propagule Multiplication
Source: MDPI journal article supplement (doi:10.3390/plants10091803), 2021-08-30
Supplement: s1 [file s1]

**Table S2.** Soil physicochemical characteristics at two elevational sites of the Puna

| Characteristics                          | Site | Abra del Cóndor (AC)          | Iturbe (It)                  |
|------------------------------------------|------|-------------------------------|------------------------------|
| Elevation (m)                            |      | 3,870                         | 3,370                        |
| Soil classification <sup>1</sup>         |      | Entisol (torrientente lithic) | Aridisol (typical paleargid) |
| Texture                                  |      | Gravel sandy                  | Sand silt gravel             |
| pH                                       |      | 5.90± 0.03                    | 6.80± 0.04                   |
| EC (mS/cm)                               |      | 0.33 ± 0.01                   | 0.33 ± 0.01                  |
| OM (%)                                   |      | 1.00 ± 0.30                   | 1.00 ± 0.30                  |
| Cox.(%)                                  |      | 0.64± 0.02                    | 0.50± 0.02                   |
| ON (g/Kg)                                |      | 1.70 ± 0.10                   | 0.60 ± 0.02                  |
| P <sup>2</sup> (ppm)                     |      | 13.18± 0.86                   | 34.30 ± 0.66                 |
| Ca <sup>2+</sup> (cmol <sub>c</sub> /Kg) |      | 4.57 ± 0.28                   | 3.36 ± 0.04                  |
| Mg <sup>2+</sup> (cmol <sub>c</sub> /Kg) |      | 1.31 ± 0.11                   | 0.69 ± 0.02                  |
| Na <sup>+</sup> (cmol <sub>c</sub> /Kg)  |      | 0.43 ± 0.06                   | 0.37 ± 0.03                  |
| K <sup>+</sup> (cmol <sub>c</sub> /Kg)   |      | 0.95 ± 0.02                   | 0.55 ± 0.02                  |

<sup>1</sup>[26]. CEC cation exchange capacity, EC electrical conductivity, OM organic matter, Cox. oxidable carbon, ON organic nitrogen, P<sup>2</sup> available soil phosphorus by Bray-Kurtz method [32]
