# Supplementary material for: Arbuscular Mycorrhizal Fungi from Argentinean Highland Puna Soils Unveiled by Propagule Multiplication
Source: MDPI journal article supplement (doi:10.3390/plants10091803), 2021-08-30
Supplement: s1 [file s1]

**Table S1.** Environmental (climatic) characteristics of the Puna Seca (Abra del Cóndor- Iturbe) [9]

| Site      | Precipitation |                     |                       | Solar radiation | Relative humidity | Daily thermal amplitude |
|-----------|---------------|---------------------|-----------------------|-----------------|-------------------|-------------------------|
|           | Mean annual   | Winter (dry season) | Summer (rainy season) |                 |                   |                         |
|           | -----mm-----  |                     |                       | --UVI--         | --%--             | --°C--                  |
| Puna Seca | 340           | 50-70               | 300-500               | >6              | 10-15             | 0-20                    |
